# Supplementary material for: Characterisation of bacteria isolated from the stingless bee, Heterotrigona itama, honey, bee bread and propolis
Source: PeerJ. 2019 Aug 22;7:e7478. doi: 10.7717/peerj.7478 (PMC6708576; doi:10.7717/peerj.7478)
Supplement: Supplemental Information 4 — Enzymatic activity (A) proteolytic, (B) lipolytic and (C) cellulolytic of 15 bacterial isolates recovered from H. itama nest products. [file peerj-07-7478-s004.xlsx]

## Sheet: File 1
	File 1. Enzymatic activities (U/mL) of bacterial isolates (Raw Data). Enzymatic activity (A) proteolytic, (B) lipolytic and (C) cellulolytic of 15 bacterial isolates recovered from H. itama nest products
	(A) Proteolytic activity (U/mL)
	Isolate	B. cereus HD1		B. aryabhattai BD8		B. stratosphericus PD6		B. altitudinis BD4		B. amyloliquefaciens PD9		B. toyonensis PD13		B. subtilis BD3		B. safensis BD9		B. pseudomycoides HM2		B. oleronius PD3		B. nealsonii PD4		E. asburiae PD12		E. cloacae PM4		P. dispersa PG1		S. kunmingensis BG1
	Test	A	B	A	B	A	B	A	B	A	B	A	B	A	B	A	B	A	B	A	B	A	B	A	B	A	B	A	B	A	B
	1	1.9316	1.9516	1.0997	1.1107	1.1186	1.0733	ND	ND	2.5686	2.5153	1.1523	1.1493	1.1286	1.0486	1.1146	1.1493	1.1153	1.1476	ND	ND	ND	ND	ND	ND	1.1223	1.1224	ND	ND	ND	ND
	2	1.9183	1.9383	1.1093	1.1133	1.1153	1.1133	ND	ND	2.5433	2.5743	1.1553	1.1513	1.1163	1.1143	1.1186	1.1233	1.1133	1.1186	ND	ND	ND	ND	ND	ND	1.1222	1.1223	ND	ND	ND	ND
	3	1.9216	1.9383	1.1056	1.1046	1.1386	1.1153	ND	ND	2.5486	2.5466	1.1513	1.1596	1.1426	1.1163	1.1143	1.1263	1.1146	1.1273	ND	ND	ND	ND	ND	ND	1.1222	1.1188	ND	ND	ND	ND
	Average (Test 1,2,3)	1.9333		1.1072		1.1124		ND		2.5495		1.1532		1.1111		1.1244		1.1228		ND		ND		ND		1.1217		ND		ND
	SD (Test 1,2,3)	0.0134		0.0038		0.0166		ND		0.0203		0.0036		0.0255		0.0121		0.0119		ND		ND		ND		0.001		ND		ND
	(B) Lipolytic activity (U/mL)
	Isolate	B. cereus HD1		B. aryabhattai BD8		B. stratosphericus PD6		B. altitudinis BD4		B. amyloliquefaciens PD9		B. toyonensis PD13		B. subtilis BD3		B. safensis BD9		B. pseudomycoides HM2		B. oleronius PD3		B. nealsonii PD4		E. asburiae PD12		E. cloacae PM4		P. dispersa PG1		S. kunmingensis BG1
	Test	A	B	A	B	A	B	A	B	A	B	A	B	A	B	A	B	A	B	A	B	A	B	A	B	A	B	A	B	A	B
	1	ND	ND	ND	ND	0.4829	0.472	0.5556	0.5138	0.7493	0.7986	ND	ND	0.7784	0.8017	0.4137	0.4282	ND	ND	ND	ND	ND	ND	ND	ND	ND	ND	ND	ND	ND	ND
	2	ND	ND	ND	ND	0.4209	0.4844	0.5556	0.5401	0.7917	0.7802	ND	ND	0.7413	0.7692	0.4426	0.3921	ND	ND	ND	ND	ND	ND	ND	ND	ND	ND	ND	ND	ND	ND
	3	ND	ND	ND	ND	0.5092	0.4813	0.59433	0.5479	0.7912	0.7455	ND	ND	0.862	0.8682	0.4282	0.3812	ND	ND	ND	ND	ND	ND	ND	ND	ND	ND	ND	ND	ND	ND
	Average (Test 1,2,3)	ND		ND		0.4751		0.5512		0.7761		ND		0.8035		0.4143		ND		ND		ND		ND		ND		ND		ND
	SD (Test 1,2,3)	ND		ND		0.0241		0.0244		0.0251		ND		0.0135		0.0264		ND		ND		ND		ND		ND		ND		ND
	(C) Cellulolytic activity (U/mL)
	Isolate	B. cereus HD1		B. aryabhattai BD8		B. stratosphericus PD6		B. altitudinis BD4		B. amyloliquefaciens PD9		B. toyonensis PD13		B. subtilis BD3		B. safensis BD9		B. pseudomycoides HM2		B. oleronius PD3		B. nealsonii PD4		E. asburiae PD12		E. cloacae PM4		P. dispersa PG1		S. kunmingensis BG1
	Test	A	B	A	B	A	B	A	B	A	B	A	B	A	B	A	B	A	B	A	B	A	B	A	B	A	B	A	B	A	B
	1	0.7611	0.7755	ND	ND	0.2976	0.2912	ND	ND	0.7115	0.7227	0.2608	0.2768	0.6971	0.6923	0.7547	0.7323	ND	ND	ND	ND	ND	ND	0.1773	0.2098	0.2512	0.2668	0.0985	0.0948	0.1773	0.1998
	2	0.7962	0.8138	ND	ND	0.3599	0.3135	ND	ND	0.7403	0.7131	0.2752	0.2432	0.6876	0.6908	0.7275	0.6987	ND	ND	ND	ND	ND	ND	0.2113	0.2074	0.2635	0.2572	0.1953	0.2374	0.1813	0.1874
	3	0.7851	0.7739	ND	ND	0.2912	0.2976	ND	ND	0.7387	0.7355	0.2656	0.2592	0.7003	0.6971	0.7323	0.7163	ND	ND	ND	ND	ND	ND	0.2112	0.2532	0.2586	0.2732	0.2755	0.1732	0.2212	0.1732
	Average (Test 1,2,3)	0.7843		ND		0.3085		ND		0.727		0.2635		0.6942		0.727		ND		ND		ND		0.2117		0.2618		0.1791		0.19
	SD (Test 1,2,3)	0.0102		ND		0.014		ND		0.0098		0.0128		0.0026		0.0158		ND		ND		ND		0.0166		0.0056		0.0151		0.0046
	NOTE:
	ND = no detectable activity
	"A" and "B" represented biological replicates.

## Sheet: Sheet1
		0.4829	0.472
		0.4209	0.4844
		0.5092	0.4813
		0.471	0.479233	0.475117
